# Supplementary material for: A combination nutritional supplement reduces DNA methylation age only in older adults with a raised epigenetic age
Source: PubMed Central journal article supplement (PMC11336001; doi:10.1007/s11357-024-01138-8), 2024-03-26

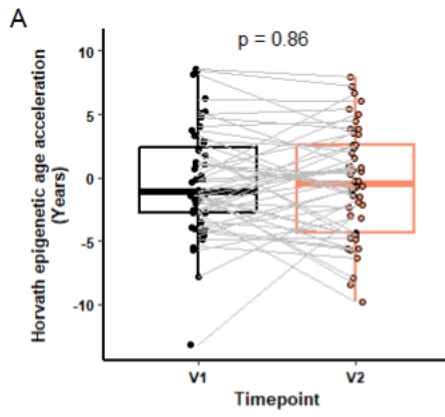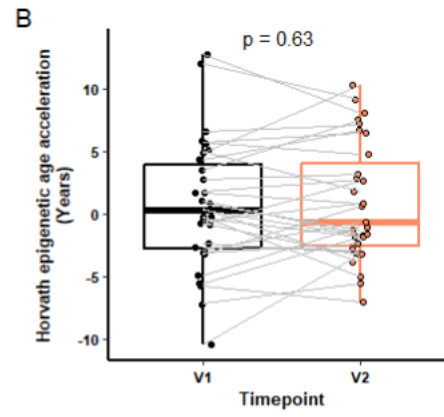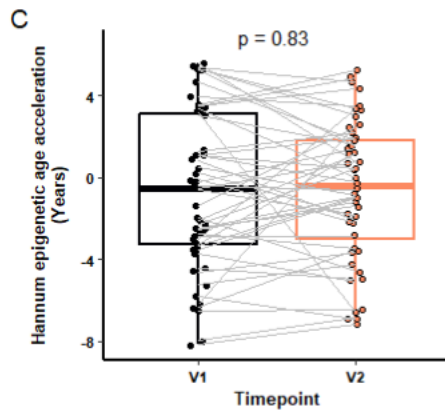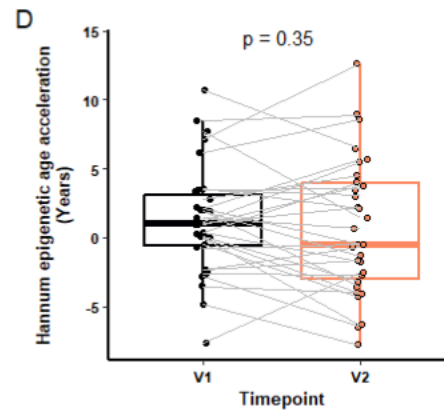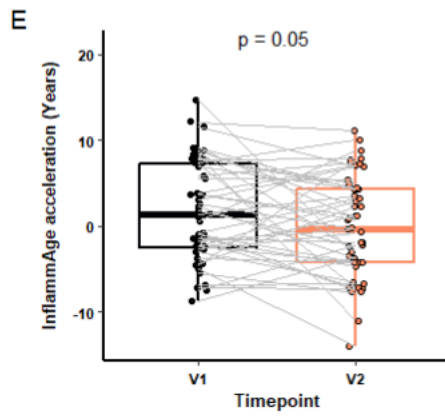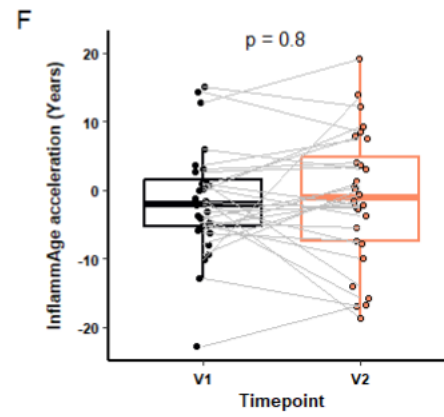

Supplement: 11357_2024_1138_MOESM2_ESM.pdf [file 11357_2024_1138_MOESM2_ESM.pdf]
